# Supplementary material for: In vivo dual RNA-seq reveals that neutrophil recruitment underlies differential tissue tropism of Streptococcus pneumoniae
Source: PubMed Central journal article supplement (PMC7275033; doi:10.1038/s42003-020-1018-x), 2020-06-05
Supplement: 42003_2020_1018_MOESM1_ESM.pdf [file 42003_2020_1018_MOESM1_ESM.pdf]

**In vivo dual RNA-seq reveals that neutrophil recruitment underlies differential tissue tropism of *Streptococcus pneumoniae***

**Supplementary Information**

# Supplementary Figures

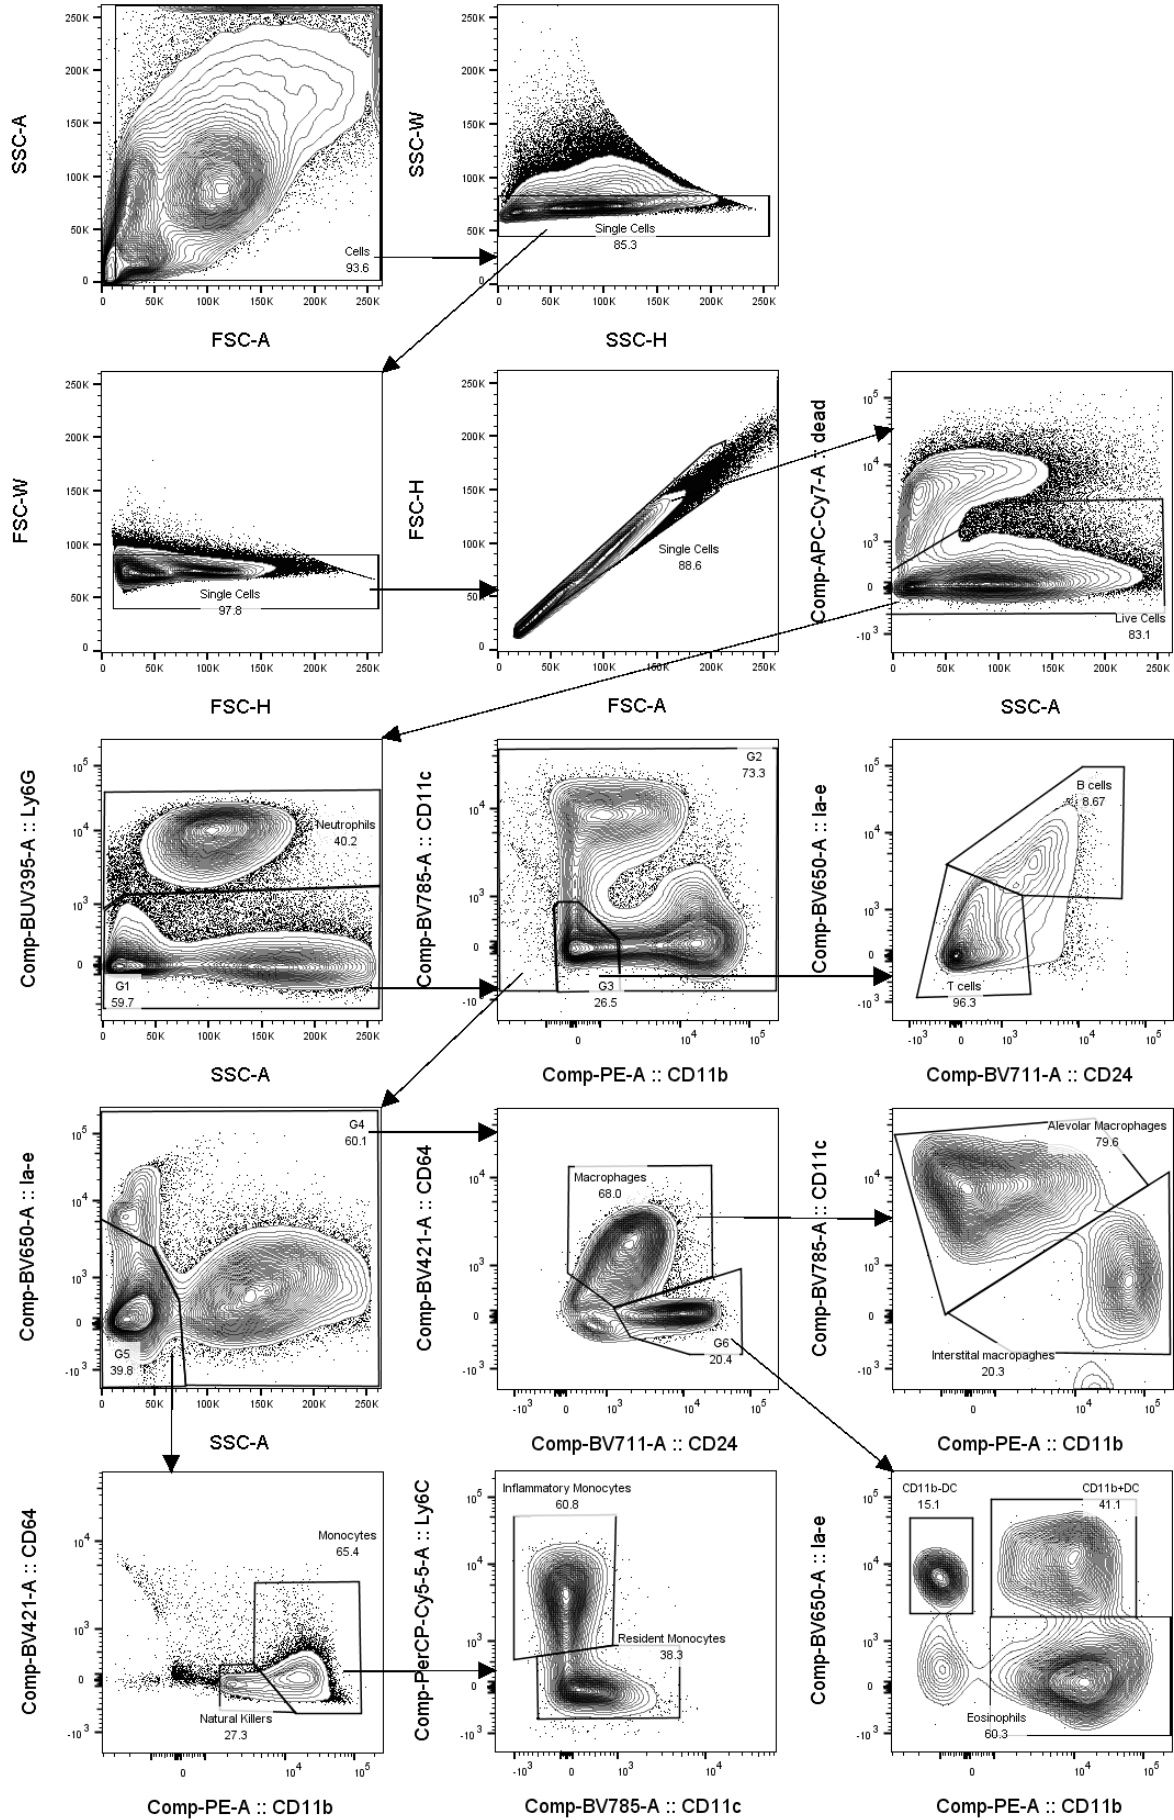

**Supplementary Fig. 1 Gating strategy 1.** Contour plots of windows and gating strategy used for the identification of major immune cell populations in pneumococcal infected mouse lungs. Cells were first gated for size and singularity, followed by exclusion of dead cells. Gates containing multiple cell populations other than single cell gates are numbered G1-G6. Gates containing single cell populations are labelled with the cell types that include: T cells, B cells, natural killer cells, neutrophils, eosinophils, inflammatory monocytes, resident monocytes, alveolar macrophages, interstitial macrophages, CD11b<sup>-</sup> dendritic cells (CD11b<sup>-</sup> DC), and CD11b<sup>+</sup> dendritic cells (CD11b<sup>+</sup> DC).

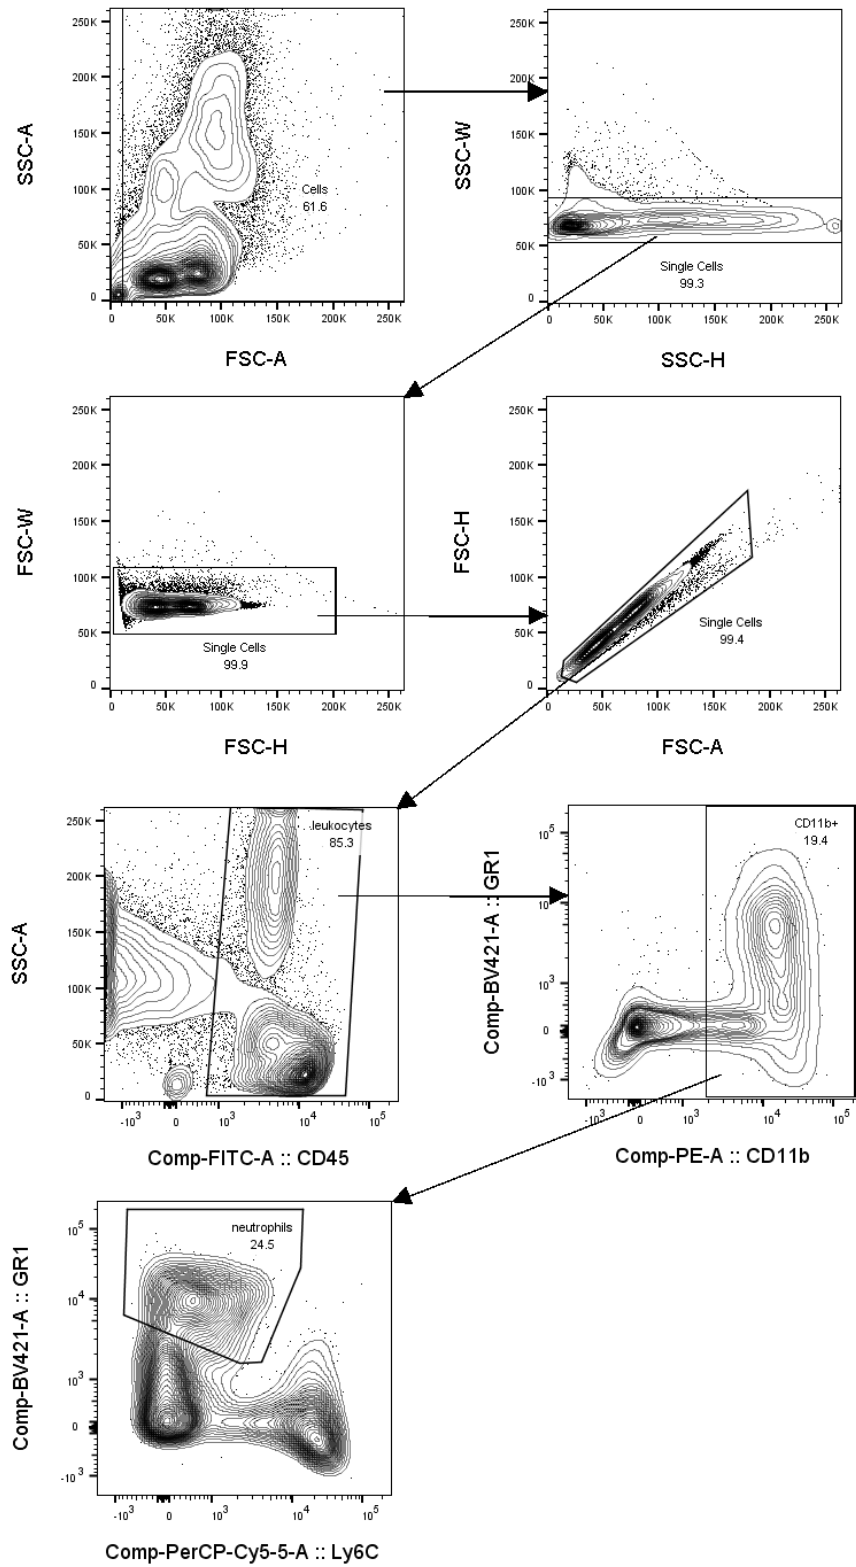

**Supplementary Fig. 2 Gating strategy 2.** Contour plots of windows and gating strategy used to validate anti-Ly6G mediated neutrophil depletion. Cells were first gated for size and singularity, followed by gating for leukocytes. CD11b<sup>+</sup> cells were then gated for, and subsequently neutrophils were detected as GR1<sup>int/hi</sup> and Ly6C<sup>int</sup>.

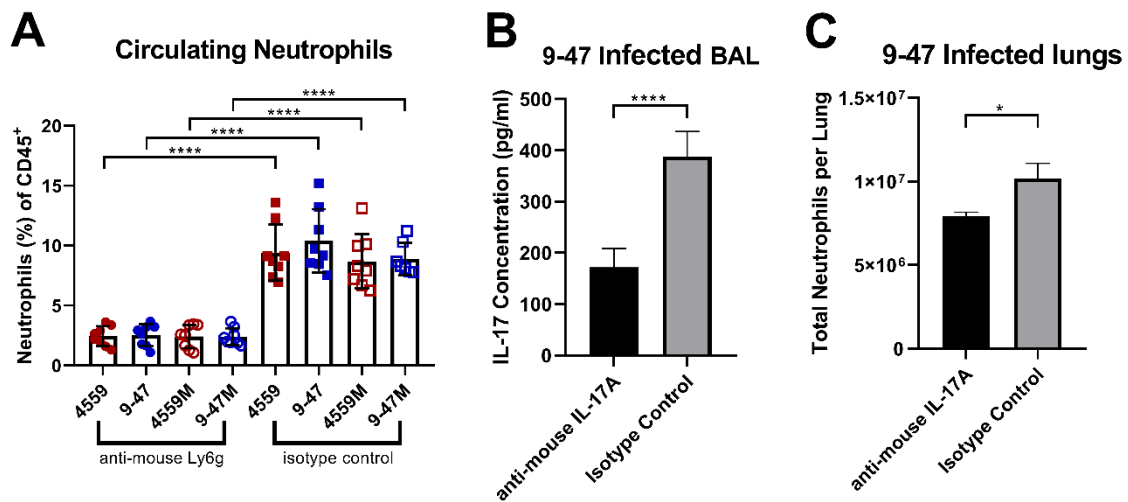

**Supplementary Fig. 3 Effect of anti-mouse Ly6G and anti-mouse IL-17A treatment on neutrophil and IL-17A levels.** **A** Groups of 8 mice per strain were treated with either 350  $\mu$ g of rat anti-mouse Ly6G or rat IgG2a isotype control antibodies (see materials and methods). Percentage of circulating neutrophils relative to live (CD45<sup>+</sup>) cells were calculated. Differences in circulating neutrophils between groups are indicated by asterisks: \*\*\*\*,  $p < 0.0001$ , by one-way ANOVA. **B & C** Groups of 3 outbred 6-week-old female Swiss (CD-1) mice were treated with either monoclonal anti-mouse IL-17A or mouse IgG1 isotype control antibodies (see materials and methods). **B** BAL was harvested 6 h post-infection and an IL-17 ELISA was performed to calculate IL-17 levels after anti-mouse IL-17A treatment. Differences in BAL IL-17 levels between groups are indicated by asterisks: \*\*\*\*,  $p < 0.0001$ , by two-tailed unpaired Student's *t*-test. **C** Lung tissue was also harvested 6 h post-infection and stained with antibodies against neutrophil surface markers (Supplementary Table 16), then analyzed by flow cytometry. Differences in lung neutrophil levels between groups are indicated by asterisks: \*,  $p < 0.05$ , by two-tailed unpaired Student's *t*-test.

## Supplementary Tables

**Supplementary Table 1.** Host and pneumococcal read counts of RNA isolated from murine lungs 6 h post-infection, for dual RNA-seq analysis.

| <b>Strain</b> | <b>Total Count</b> | <b>Murine Reads</b> | <b>Pneumococcal reads</b> | <b>% Murine</b> | <b>% Pneumococcal</b> |
|---------------|--------------------|---------------------|---------------------------|-----------------|-----------------------|
| 9-47          | 46316502           | 46141193            | 175309                    | 99.621%         | 0.379%                |
| 9-47          | 59564884           | 59248907            | 315977                    | 99.470%         | 0.530%                |
| 9-47          | 40204707           | 40059925            | 144782                    | 99.640%         | 0.360%                |
| 9-47M         | 30056978           | 29956541            | 100437                    | 99.666%         | 0.334%                |
| 9-47M         | 47479606           | 47290932            | 188674                    | 99.603%         | 0.397%                |
| 9-47M         | 48752703           | 48544160            | 208543                    | 99.572%         | 0.428%                |
| 4559          | 40887116           | 40652817            | 234299                    | 99.427%         | 0.573%                |
| 4559          | 42418850           | 42218273            | 200577                    | 99.527%         | 0.473%                |
| 4559          | 36017301           | 35853955            | 163346                    | 99.546%         | 0.454%                |
| 4559M         | 25210330           | 25045001            | 165329                    | 99.344%         | 0.656%                |
| 4559M         | 52201495           | 51833174            | 368321                    | 99.294%         | 0.706%                |
| 4559M         | 34141985           | 33825643            | 316342                    | 99.073%         | 0.927%                |

**Supplementary Table 2** Pneumococcal genes that were consistently up or down regulated between strains that persisted in murine lungs (4559-Blood and 9-47M) or between the strains that were cleared from the lungs (9-47-Ear and 4559M).

| <b>Gene (locus tag)</b>   | <b>Comparison</b>      | <b>Fold Change</b> | <b>padj</b>            |
|---------------------------|------------------------|--------------------|------------------------|
| <i>adhP</i> (Sp947_00279) | 9-47-Ear vs 9-47M      | 0.48               | 0.004                  |
| "                         | 9-47-Ear vs 4559-Blood | 0.32               | $5.38 \times 10^{-7}$  |
| "                         | 9-47M vs 4559M         | 2.39               | 0.00018                |
| "                         | 4559-Blood vs 4559M    | 3.53               | $2.23 \times 10^{-8}$  |
| <i>nanB</i> (Sp947_00844) | 9-47-Ear vs 9-47M      | 313                | $3.08 \times 10^{-1}$  |
| "                         | 9-47-Ear vs 4559-Blood | 2.53               | $1.14 \times 10^{-8}$  |
| "                         | 9-47M vs 4559M         | 0.01               | $4.59 \times 10^{-8}$  |
| <i>glpO</i> (Sp947_02129) | 9-47-Ear vs 9-47M      | 5.86               | $1.19 \times 10^{-37}$ |
| "                         | 9-47-Ear vs 4559-Blood | 1.89               | $2.26 \times 10^{-7}$  |
| "                         | 9-47M vs 4559M         | 0.25               | $3.55 \times 10^{-23}$ |

**Supplementary Table 3. Oligonucleotide primers used in this study.**

| <b>Primer</b>         | <b>Sequence (5' → 3')</b> | <b>Reference</b>     |
|-----------------------|---------------------------|----------------------|
| <i>rafR</i> F:        | CCAGCCATTCGTGATACATA      | Minhas <i>et al.</i> |
| <i>rafR</i> R:        | CCTCCAGTGATTCCTAACCA      | Minhas <i>et al.</i> |
| <i>aga</i> F:         | AAGGTCAGAATGGTCCACAG      | Minhas <i>et al.</i> |
| <i>aga</i> R:         | GCTGGAAAATCAGCCATAAA      | Minhas <i>et al.</i> |
| <i>rafG</i> F:        | CCTATGGCAGCCTACTCCATC     | Minhas <i>et al.</i> |
| <i>rafG</i> R:        | GGGTCTGTGGAATCGCATAGG     | Minhas <i>et al.</i> |
| <i>rafK</i> F:        | GCTGGTTTACGTTCCAAGAA      | Minhas <i>et al.</i> |
| <i>rafK</i> R:        | GCTGGTTTACGTTCCAAGAA      | Minhas <i>et al.</i> |
| Sp947_00054 F:        | GCAAGACAGACTACGAAGCAG     | This study           |
| Sp947_00054 R:        | TCCTCAATCCCATGAGCTC       | This study           |
| Sp947_00279 F:        | GTGGCACTTGCGAATACTGT      | This study           |
| Sp947_00279 R:        | GGATCAAGTCCGTCAGGAAC      | This study           |
| Sp947_00544 F:        | CTGTTGAGCCTCGTAACTC       | This study           |
| Sp947_00544 R:        | CGTGGAAGGTGGATATTCTC      | This study           |
| Sp947_00675 F:        | CCGTGTTGGTTGGAACCAG       | This study           |
| Sp947_00675 R:        | CTTGACCAGCATCACCAAGG      | This study           |
| Sp947_00841 F:        | GGTTGCGTTGACTGGTAGTT      | This study           |
| Sp947_00841 R:        | CCAATACCAGCTTCTGCTCC      | This study           |
| Sp947_01448 F:        | ACAGCTCCAGCTATGAAGGG      | This study           |
| Sp947_01448 R:        | AGACTGAGCCCATAAGATG       | This study           |
| Sp947_01582 F:        | GTCAACTGTGCAGGTCTTGC      | This study           |
| Sp947_01582 R:        | GCTCCATCCTGCATATGCAT      | This study           |
| Sp947_01598 F:        | GTTGATTGCTATCGATGGT       | This study           |
| Sp947_01598 R:        | CATCATATTCTTGGGTAACGC     | This study           |
| Sp947_01629 F:        | CCAGTCCTTGTTGCAGTCTG      | This study           |
| Sp947_01629 R:        | CGCATCAGACACAACCAACA      | This study           |
| Sp947_01798 F:        | CGAGATATCGCTGCTGAGTA      | This study           |
| Sp947_01798 R:        | CAAACGCTCTGTTCTGGAAC      | This study           |
| Sp947_01920 F:        | TCCATGGATACCTCAACTCG      | This study           |
| Sp947_01920 R:        | CTAGAGGCGTCGTATCTCGA      | This study           |
| Sp947_01951 F:        | AATGGTCATTCCAGAAGCAG      | This study           |
| Sp947_01951 R:        | CTTCTTGATAAGCAGGTGTC      | This study           |
| Sp947_01955 F:        | CCATGCCATGGTAGAGCTTG      | This study           |
| Sp947_01955 R:        | TGGCAGCATCCATTGGAGAC      | This study           |
| Sp947_01982 F:        | AGGCAAGCAGTACAGGCAAC      | This study           |
| Sp947_01982 R:        | GTCCCTGCTTGATTTCGACAG     | This study           |
| Sp947_02097 F:        | CATTCTTGCTCCTCTCCAAG      | This study           |
| Sp947_02097 R:        | GATTGATCATGAGACCTGCG      | This study           |
| ENSMUSG00000063021 F: | CTGCTTGCCCTTTCCTGACAT     | This study           |
| ENSMUSG00000063021 R: | ATTGGTCTAGGTGCAATGCTTC    | This study           |
| ENSMUSG00000068855 F: | AAGTGACGATCGCACAGGG       | This study           |
| ENSMUSG00000068855 R: | CGTGTTGAGTTTCACTTGCTCT    | This study           |
| ENSMUSG00000063954 F: | AACTACGCGGAGCGTGTGG       | This study           |
| ENSMUSG00000063954 R: | CGCGTCTTCTTGTTGTCGC       | This study           |
| ENSMUSG00000034855 F: | TAAACTCATGGCACCGGCAT      | This study           |
| ENSMUSG00000034855 R: | GGCATTGTCAGCTTTACCC       | This study           |
| ENSMUSG00000048806 F: | GCACTGGGTGGAATGAGACT      | This study           |
| ENSMUSG00000048806 R: | GTGGAGAGCAGTTGAGGACA      | This study           |



|                       |                        |            |
|-----------------------|------------------------|------------|
| ENSMUSG00000074695 F: | AGCTGCTTGGGCTTCATAAC   | This study |
| ENSMUSG00000074695 R: | CCCCTGCAATCACCTAATCC   | This study |
| ENSMUSG00000000157 F: | CACCTGGCTCCTTGGAGAG    | This study |
| ENSMUSG00000000157 R: | AGCCAAGTGGAAATCGTTGT   | This study |
| ENSMUSG00000017300 F: | AGGAACTGGCTGAGTGCTTC   | This study |
| ENSMUSG00000017300 R: | GCTCCATCTGCTCTCAGGTC   | This study |
| ENSMUSG00000030730 F: | CCTCCCTACCTTGATGCCAG   | This study |
| ENSMUSG00000030730 R: | GGAAGGGTCAAGGCTTCAGG   | This study |
| ENSMUSG00000026407 F: | CATGAGGACCTGAGGTGCAG   | This study |
| ENSMUSG00000026407 R: | CTGGTTTGACTCTGCTGGCT   | This study |
| ENSMUSG00000026985 F: | GCCATGTCTTCTCAAAGCAAT  | This study |
| ENSMUSG00000026985 R: | TGAACCCTGTAGTTTCTGGGAG | This study |
| ENSMUSG00000061928 F: | GGCACTGGCATAGCCTCATA   | This study |
| ENSMUSG00000061928 R: | TTCCAGAGACTACCCACCC    | This study |
| ENSMUSG00000063130 F: | CCCTCCACGGGACTTTGTC    | This study |
| ENSMUSG00000063130 R: | CAATGACCCCCAGCTCTACT   | This study |
| ENSMUSG00000030046 F: | GCATGACCCTTTGCTGGTTG   | This study |
| ENSMUSG00000030046 R: | CCAGATCCTGCTCATGGGTG   | This study |
| ENSMUSG00000033765 F: | ACAAGCTCCAACCTCGTCGTC  | This study |
| ENSMUSG00000033765 R: | CTCCAGATGGCACAGCATCC   | This study |
| ENSMUSG00000028001 F: | CTGCACCCGTTTCCTAACCT   | This study |
| ENSMUSG00000028001 R: | CACATGGTCAAGTCCCTGCC   | This study |
| ENSMUSG00000033860 F: | TGGAGAGACTCCAGGGATAC   | This study |
| ENSMUSG00000033860 R: | GTTTGTCTGACAGCGCATGA   | This study |
| ENSMUSG00000033831 F: | TGGACAGTCATACAGAACCGT  | This study |
| ENSMUSG00000033831 R: | TTCACTCGCAGTCTTTACCTG  | This study |

**Supplementary Table 4.** Bacterial strains, antibodies, chemicals and commercial assays used in this study.

| <b>Bacterial Strains</b>                                                                                                                                         | <b>Source</b>            | <b>Identifier</b>               |
|------------------------------------------------------------------------------------------------------------------------------------------------------------------|--------------------------|---------------------------------|
| <i>Streptococcus pneumoniae</i> : Clinical blood isolate capsular serotype 14, Multi Locus Sequence Type 15: 4559-Blood                                          | Minhas <i>et al.</i>     | N/A                             |
| <i>Streptococcus pneumoniae</i> : Clinical isolate ear capsular serotype 14, Multi Locus Sequence Type 15: 9-47-Ear                                              | Minhas <i>et al.</i>     | N/A                             |
| <i>Streptococcus pneumoniae</i> : Clinical isolate ear capsular serotype 14, Multi Locus Sequence Type 15: 4559M (4559-Blood containing <i>rafR</i> of 9-47-Ear) | Minhas <i>et al.</i>     | N/A                             |
| <i>Streptococcus pneumoniae</i> : Clinical isolate ear capsular serotype 14, Multi Locus Sequence Type 15: 9-47M (947 containing <i>rafR</i> of 4559-Blood)      | Minhas <i>et al.</i>     | N/A                             |
| <b>Antibodies</b>                                                                                                                                                | <b>Source</b>            | <b>Identifier</b>               |
| Anti-mouse/human CD11b-PE (clone M1/70)                                                                                                                          | BioLegend                | Cat# 101208, RRID: AB 312791    |
| Anti-mouse CD11c-BV786 (clone HL3)                                                                                                                               | BD Biosciences           | Cat# 563735, RRID: AB 2738394   |
| Anti-mouse CD24-BV711 (clone M1/69)                                                                                                                              | BD Biosciences           | Cat# 563450, RRID: AB 2738213   |
| Anti-mouse CD45-FITC (clone 30-F11)                                                                                                                              | BioLegend                | Cat# 103107, RRID: AB 312972    |
| Anti-mouse CD64-BV421 (clone X54-5/7.1)                                                                                                                          | BioLegend                | Cat# 139309, RRID: AB 2562694   |
| Anti-mouse Ly6C-PerCP/Cy5.5 (clone HK1.4)                                                                                                                        | BioLegend                | Cat# 128011, RRID: AB 1659242   |
| Anti-mouse Ly6G-BUV395 (clone 1A8)                                                                                                                               | BD Biosciences           | Cat# 563978, RRID: AB 2716852   |
| Anti-mouse I-A/I-E-BV650 (clone M5/114.15.2)                                                                                                                     | BD Biosciences           | Cat# 563415, RRID: AB 2738192   |
| Anti-mouse Ly6G (clone 1A8)                                                                                                                                      | Bio X Cell               | Cat# BE0075-1, RRID: AB 1107721 |
| Rat IgG2A Isotype Control (clone 54447)                                                                                                                          | R and D Systems          | Cat# MAB006, RRID: AB 357349    |
| Anti-mouse Ly-6G, Ly-6C-Biotin (clone RB6-8C5)                                                                                                                   | BD Biosciences           | Cat# 553125, RRID: AB 394641    |
| Anti-mouse IL-17A (clone 17F3)                                                                                                                                   | Bio X Cell               | Cat# BE0173, RRID: AB 10950102  |
| Mouse IgG1 Isotype Control (clone MOPC-21)                                                                                                                       | Bio X Cell               | Cat# BE0083, RRID: AB 1107784   |
| <b>Chemicals</b>                                                                                                                                                 | <b>Source</b>            | <b>Identifier</b>               |
| Zombie NIR™ Fixable Viability Kit                                                                                                                                | BioLegend                | Cat# 423105                     |
| BV421 Streptavidin                                                                                                                                               | BD Biosciences           | Cat# 563259                     |
| Horse serum, heat inactivated                                                                                                                                    | Thermo Fisher Scientific | Cat# <a href="#">26050088</a>   |

|                                                          |                                             |                   |
|----------------------------------------------------------|---------------------------------------------|-------------------|
| LAB LEMCO Nutrient Broth + 10% horse serum (serum broth) | Adelaide University Technical Services Unit | Custom Synthesis  |
| Columbia blood agar base (dehydrated)                    | Thermo Scientific Oxoid                     | Cat# CM0331T      |
| Defibrinated horse blood                                 | Australian Ethical Biologicals              | Cat# PDHB500      |
| Pentobarbital Sodium Anaesthetic Injection               | Illum                                       | N/A               |
| Acid-Phenol:Chloroform, pH 4.5 (with IAA, 125:24:1)      | Thermo Fisher Scientific                    | Cat# AM9722       |
| SuperScript® III Platinum® One-Step qRT-PCR Kit          | Thermo Fisher Scientific                    | Cat# 11736059     |
| TRIzol® Reagent                                          | Thermo Fisher Scientific                    | Cat# 15596026     |
| DMEM + HEPES                                             | Thermo Fisher Scientific                    | Cat # 12430054    |
| Fetal Bovine Serum                                       | Corning                                     | Cat# 35076CV      |
| Collagenase from <i>Clostridium histolyticum</i>         | Sigma-Aldrich                               | Cat# C9891        |
| Dnase I                                                  | Sigma-Aldrich                               | Cat# 11284932001  |
| Sodium azide solution                                    | Sigma-Aldrich                               | Cat# 08591        |
| Paraformaldehyde                                         | Sigma-Aldrich                               | Cat# P6148        |
| Bovine Serum Albumin Fraction V                          | Sigma-Aldrich                               | Cat# 10735        |
| 10x RBC lysis buffer                                     | eBioscience                                 | Cat# 00430054     |
| <b>Commercial Assays</b>                                 | <b>Source</b>                               | <b>Identifier</b> |
| RNeasy Mini Kit                                          | Qiagen                                      | Cat# 74106        |
| Ribo-Zero Murine rRNA depletion kit                      | Illumina                                    | N/A               |
| Ribo-Zero Gram positive bacteria rRNA depletion kit      | Illumina                                    | N/A               |
| Stranded cDNA library preparation kit                    | Illumina                                    | N/A               |
| Mouse IL-17 DuoSet ELISA                                 | R and D Systems                             | Cat# DY421-05     |
