# Supplementary material for: In vivo dual RNA-seq reveals that neutrophil recruitment underlies differential tissue tropism of Streptococcus pneumoniae
Source: PubMed Central journal article supplement (PMC7275033; doi:10.1038/s42003-020-1018-x), 2020-06-05
Supplement: 42003_2020_1018_MOESM2_ESM.pdf [file 42003_2020_1018_MOESM2_ESM.pdf]

## Description of Additional Supplementary Files

### **File Name: Supplementary Data 1**

**Description:** Pneumococcal differential gene expression in the lungs 6 h post-infection, 9-47-Ear vs 9-47M. Genes with fold change (FC) greater than 2 and  $p < 0.05$  are shown. FC values highlighted in blue = upregulated in 9-47-Ear, while values highlighted in red = upregulated in 9-47M.

### **File Name: Supplementary Data 2**

**Description:** Pneumococcal differential gene expression in the lungs 6 h post-infection, 9-47-Ear vs 4559-Blood. Genes with fold change (FC) greater than 2 and  $p < 0.05$  are shown. FC values highlighted in blue = upregulated in 9-47-Ear, while values highlighted in red = upregulated in 4559-Blood.

### **File Name: Supplementary Data 3**

**Description:** Pneumococcal differential gene expression in the lungs 6 h post-infection, 9-47-Ear vs 4559M. Genes with fold change (FC) greater than 2 and  $p < 0.05$  are shown. FC values highlighted in blue = upregulated in 9-47-Ear, while values highlighted in red = upregulated in 4559M.

### **File Name: Supplementary Data 4**

**Description:** Pneumococcal differential gene expression in the lungs 6 h post-infection, 9-47M vs 4559-Blood. Genes with fold change (FC) greater than 2 and  $p < 0.05$  are shown. FC values highlighted in blue = upregulated in 9-47M, while values highlighted in red = upregulated in 4559-Blood.

### **File Name: Supplementary Data 5**

**Description:** Pneumococcal differential gene expression in the lungs 6 h post-infection, 9-47M vs 4559M. Genes with fold change (FC) greater than 2 and  $p < 0.05$  are shown. FC values highlighted in blue = upregulated in 9-47M, while values highlighted in red = upregulated in 4559M.

### **File Name: Supplementary Data 6**

**Description:** Pneumococcal differential gene expression in the lungs 6 h post-infection, 4559-Blood vs 4559M. Genes with fold change (FC) greater than 2 and  $p < 0.05$  are shown. FC values highlighted in blue = upregulated in 4559-Blood, while values highlighted in red = upregulated in 4559M.

### **File Name: Supplementary Data 7**

**Description:** Murine differential gene expression in the lungs 6 h post-infection, 9-47-Ear vs 9-47M. Genes with fold change (FC) greater than 1.5 and  $p < 0.05$  are shown. FC values highlighted in blue = upregulated in 9-47-Ear, while values highlighted in red = upregulated in 9-47M.

**File Name: Supplementary Data 8**

**Description:** Murine differential gene expression in the lungs 6 h post-infection, 9-47-Ear vs 4559-Blood. Genes with fold change (FC) greater than 1.5 and  $p < 0.05$  are shown. FC values highlighted in blue = upregulated in 9-47-Ear, while values highlighted in red = upregulated in 4559-Blood.

**File Name: Supplementary Data 9**

**Description:** Murine differential gene expression in the lungs 6 h post-infection, 9-47-Ear vs 4559M. Genes with fold change (FC) greater than 1.5 and  $p < 0.05$  are shown. FC values highlighted in blue = upregulated in 9-47-Ear, while values highlighted in red = upregulated in 4559M.

**File Name: Supplementary Data 10**

**Description:** Murine differential gene expression in the lungs 6 h post-infection, 9-47M vs 4559. Genes with fold change (FC) greater than 1.5 and  $p < 0.05$  are shown. FC values highlighted in blue = upregulated in 9-47M, while values highlighted in red = upregulated in 4559.

**File Name: Supplementary Data 11**

**Description:** Murine differential gene expression in the lungs 6 h post-infection, 9-47M vs 4559M. Genes with fold change (FC) greater than 1.5 and  $p < 0.05$  are shown. FC values highlighted in blue = upregulated in 9-47M, while values highlighted in red = upregulated in 4559M.

**File Name: Supplementary Data 12**

**Description:** Murine differential gene expression in the lungs 6 h post-infection, 4559-Blood vs 4559M. Genes with fold change (FC) greater than 1.5 and  $p < 0.05$  are shown. FC values highlighted in blue = upregulated in 4559-Blood, while values highlighted in red = upregulated in 4559M.

**File Name: Supplementary Data 13**

**Description:** Source data files for Figures 2-7.
