# Supplementary material for: In vivo dual RNA-seq reveals that neutrophil recruitment underlies differential tissue tropism of Streptococcus pneumoniae
Source: PubMed Central journal article supplement (PMC7275033; doi:10.1038/s42003-020-1018-x), 2020-06-05
Supplement: 42003_2020_1018_MOESM5_ESM.pdf [file 42003_2020_1018_MOESM5_ESM.pdf]

## Reporting Summary

Nature Research wishes to improve the reproducibility of the work that we publish. This form provides structure for consistency and transparency in reporting. For further information on Nature Research policies, see [Authors & Referees](#) and the [Editorial Policy Checklist](#).

### Statistics

For all statistical analyses, confirm that the following items are present in the figure legend, table legend, main text, or Methods section.

n/a Confirmed

- The exact sample size ( $n$ ) for each experimental group/condition, given as a discrete number and unit of measurement
- A statement on whether measurements were taken from distinct samples or whether the same sample was measured repeatedly
- The statistical test(s) used AND whether they are one- or two-sided  
*Only common tests should be described solely by name; describe more complex techniques in the Methods section.*
- A description of all covariates tested
- A description of any assumptions or corrections, such as tests of normality and adjustment for multiple comparisons
- A full description of the statistical parameters including central tendency (e.g. means) or other basic estimates (e.g. regression coefficient) AND variation (e.g. standard deviation) or associated estimates of uncertainty (e.g. confidence intervals)
- For null hypothesis testing, the test statistic (e.g.  $F$ ,  $t$ ,  $r$ ) with confidence intervals, effect sizes, degrees of freedom and  $P$  value noted  
*Give  $P$  values as exact values whenever suitable.*
- For Bayesian analysis, information on the choice of priors and Markov chain Monte Carlo settings
- For hierarchical and complex designs, identification of the appropriate level for tests and full reporting of outcomes
- Estimates of effect sizes (e.g. Cohen's  $d$ , Pearson's  $r$ ), indicating how they were calculated

*Our web collection on [statistics for biologists](#) contains articles on many of the points above.*

### Software and code

Policy information about [availability of computer code](#)

Data collection

RNA was isolated from murine lungs 6 h post pneumococcal infection. RNA quality was checked using chip-based capillary electrophoresis. Samples were then simultaneously depleted from murine and pneumococcal ribosomal RNAs by dual rRNA-depletion as previously described (Aprianto et al., 2016). Stranded cDNA library preparation was performed according to the prescribed protocol (Illumina, US). Sequencing was performed for twelve samples in one lane of Illumina NextSeq 500, High Output Flowcell in 85 single end mode.

Flow cytometry data was acquired using BD FACSDiva.

Data analysis

For sequence data analysis:

Quality of raw libraries was checked (Andrews and Babraham Bioinformatics, 2010) (FastQC v0.11.8, Babraham Bioinformatics, UK). In order to improve the quality of alignment, we trimmed the reads (Bolger et al., 2014) using the following criteria: (i) removal of adapter sequence, if any, based on TruSeq3-SE library, (ii) removal of low quality leading and trailing nucleotides, (iii) a five-nucleotide sliding window was created for surviving reads, in which the average quality score must be above 20 and (iv) minimum remaining length must be above 50 (Trimmomatic v0.38). The quality of trimmed reads were confirmed using FastQC (Andrews and Babraham Bioinformatics, 2010).

Alignment was performed by RNA-STAR (v2.6.0a) (Dobin et al., 2013) with the following options: (i) alignIntronMax 1 and (ii) sjdbOverhang 84. The aligned reads were then summarized (featureCount v1.6.3) according to the chimeric annotation file in stranded, multimapping (-M), fractionized (-fraction) and overlapping (-O) modes (Liao et al., 2014). In order to compare gene expression between strains from ear and blood isolate backgrounds, we prepared a common pneumococcal annotation file using Mauve v20150226 (Darling et al., 2004).

For Flow cytometry analysis:

FlowJo software, version 10.4.1 used for gating and analysis of flow cytometry data.

For manuscripts utilizing custom algorithms or software that are central to the research but not yet described in published literature, software must be made available to editors/reviewers. We strongly encourage code deposition in a community repository (e.g. GitHub). See the Nature Research [guidelines for submitting code & software](#) for further information.

## Data

Policy information about [availability of data](#)

All manuscripts must include a [data availability statement](#). This statement should provide the following information, where applicable:

- Accession codes, unique identifiers, or web links for publicly available datasets
- A list of figures that have associated raw data
- A description of any restrictions on data availability

The transcriptomic datasets are available in the GEO repository, accession number GSE123982.

## Field-specific reporting

Please select the one below that is the best fit for your research. If you are not sure, read the appropriate sections before making your selection.

- Life sciences       Behavioural & social sciences       Ecological, evolutionary & environmental sciences

For a reference copy of the document with all sections, see [nature.com/documents/nr-reporting-summary-flat.pdf](https://www.nature.com/documents/nr-reporting-summary-flat.pdf)

## Life sciences study design

All studies must disclose on these points even when the disclosure is negative.

|                 |                                                                                                                                                                                                                                                                                                                    |
|-----------------|--------------------------------------------------------------------------------------------------------------------------------------------------------------------------------------------------------------------------------------------------------------------------------------------------------------------|
| Sample size     | Sample sizes were chosen on the basis of previous experience with the animal model employed.                                                                                                                                                                                                                       |
| Data exclusions | No data were excluded                                                                                                                                                                                                                                                                                              |
| Replication     | All attempts at replication were successful. Experiments were repeated at least once and all data presented in the manuscript were successfully reproduced without exclusions.                                                                                                                                     |
| Randomization   | All mice used for experiments throughout this study were female, and all within a set age range for a given experiment (e.g. all mice were at 5-6 weeks of age at the start date of vaccination-challenge experiments). Mice were allocated randomly into experimental groups prior to any experiments commencing. |
| Blinding        | The experiments were not performed blinded. All experiments were performed by Vikrant Minhas as part of his PhD project. Staff resources for routine experimental blinding were not available.                                                                                                                     |

## Reporting for specific materials, systems and methods

We require information from authors about some types of materials, experimental systems and methods used in many studies. Here, indicate whether each material, system or method listed is relevant to your study. If you are not sure if a list item applies to your research, read the appropriate section before selecting a response.

### Materials & experimental systems

### Methods

- | n/a                                 | Involved in the study                                           |
|-------------------------------------|-----------------------------------------------------------------|
| <input type="checkbox"/>            | <input checked="" type="checkbox"/> Antibodies                  |
| <input checked="" type="checkbox"/> | <input type="checkbox"/> Eukaryotic cell lines                  |
| <input checked="" type="checkbox"/> | <input type="checkbox"/> Palaeontology                          |
| <input type="checkbox"/>            | <input checked="" type="checkbox"/> Animals and other organisms |
| <input checked="" type="checkbox"/> | <input type="checkbox"/> Human research participants            |
| <input checked="" type="checkbox"/> | <input type="checkbox"/> Clinical data                          |

- | n/a                                 | Involved in the study                              |
|-------------------------------------|----------------------------------------------------|
| <input checked="" type="checkbox"/> | <input type="checkbox"/> ChIP-seq                  |
| <input type="checkbox"/>            | <input checked="" type="checkbox"/> Flow cytometry |
| <input checked="" type="checkbox"/> | <input type="checkbox"/> MRI-based neuroimaging    |

## Antibodies

Antibodies used

Below are all the commercially available antibodies used in this study. Information is as follows: target, fluorophore, supplier, clone name, catalogue number and RRID, as found in supplementary table S14.

Anti-mouse/human CD11b-PE (clone M1/70), BioLegend, Cat# 101208, RRID: AB\_312791  
 Anti-mouse CD11c-BV786 (clone HL3), BD Biosciences, Cat# 563735, RRID: AB\_2738394  
 Anti-mouse CD24-BV711 (clone M1/69), BD Biosciences, Cat# 563450, RRID: AB\_2738213  
 Anti-mouse CD45-FITC (clone 30-F11), BioLegend, Cat# 103107, RRID: AB\_312972

Anti-mouse CD64-BV421 (clone X54-5/7.1), BioLegend, Cat# 139309, RRID: AB\_2562694  
 Anti-mouse Ly6C-PerCP/Cy5.5 (clone HK1.4), BioLegend, Cat# 128011, RRID: AB\_1659242  
 Anti-mouse Ly6G-BUV395 (clone 1A8), BD Biosciences, Cat# 563978, RRID: AB\_2716852  
 Anti-mouse I-A/I-E-BV650 (clone M5/114.15.2), BD Biosciences, Cat# 563415, RRID: AB\_2738192  
 Anti-mouse Ly6G (clone 1A8), Bio X Cell, Cat# BE0075-1, RRID: AB\_1107721  
 Rat IgG2A Isotype Control (clone 54447), R and D Systems, Cat# MAB006, RRID: AB\_357349  
 Anti-mouse Ly-6G, Ly-6C-Biotin (clone RB6-8C5), BD Biosciences, Cat# 553125, RRID: AB\_394641  
 Anti-mouse IL-17A (clone 17F3), Bio X Cell, Cat# BE0173, RRID: AB\_10950102  
 Mouse IgG1 Isotype Control (clone MOPC-21), Bio X Cell, Cat# BE0083, RRID: AB\_1107784

## Validation

All commercially available antibodies were validated specifically for the required experiment (flow cytometry) by the manufacturer (BD, Biolegend, Bio X Cell and R and D Systems). Antibodies were used only on species for which they have been validated by the vendor. Validation data are available on the manufacturer's website (BD bioscience; <https://www.bdbiosciences.com/eu/reagents/research/antibodies-buffers/immunology-reagents/c/744843>, Bio X Cell: <https://bxccl.com/>, BioLegend: <https://www.biolegend.com/en-us/immunobiology> and R and D systems: <https://www.rndsystems.com/products/antibodies>). Appropriate antibody dilutions were performed based on preliminary experiments.

## Animals and other organisms

Policy information about [studies involving animals](#); [ARRIVE guidelines](#) recommended for reporting animal research

## Laboratory animals

5-6 week-old female Swiss (CD-1) mice

## Wild animals

No wild animals involved

## Field-collected samples

No samples collected from the field

## Ethics oversight

Experiments involving animals were approved by the University of Adelaide Animal Ethics Committee

Note that full information on the approval of the study protocol must also be provided in the manuscript.

## Flow Cytometry

### Plots

Confirm that:

- The axis labels state the marker and fluorochrome used (e.g. CD4-FITC).
- The axis scales are clearly visible. Include numbers along axes only for bottom left plot of group (a 'group' is an analysis of identical markers).
- All plots are contour plots with outliers or pseudocolor plots.
- A numerical value for number of cells or percentage (with statistics) is provided.

### Methodology

## Sample preparation

For analysis of major immune cell populations in murine lungs, 6 h post pneumococcal infection: Groups of 8 outbred 6-week-old female Swiss (CD-1) mice (32 in total) were anesthetized and challenged with the  $1 \times 10^8$  cfu/ml of pneumococci. Mice were euthanized by CO<sub>2</sub> asphyxiation at 6 h, then lungs were finely macerated in 1 mL prewarmed digestion medium (DMEM + 5% FCS, 10 mM HEPES, 2.5 mM CaCl<sub>2</sub>, 0.2 U mL<sup>-1</sup> penicillin/gentamicin, 1 mg mL<sup>-1</sup> collagenase IA, 30 U mL<sup>-1</sup> DNase) and incubated at 37°C for 1 h with mixing every 20 min. Single cells were then prepared for acquisition on a BD LSRFortessa X20 flow cytometer as previously described (David et al., 2019). Single cell suspensions were filtered through 70 µm filters (BD). Spleen and mLN were harvested, and single cell suspensions prepared by mechanical disruption through a 70 µm filter. All tissue samples were incubated in red cell lysis buffer (155 mM NH<sub>4</sub>Cl and 170 mM Tris-HCl (pH 7.65) combined at a 9:1 ratio, with pH adjusted to 7.2) for 45 min at 37°C. Samples were thoroughly washed in PBS and kept on ice until staining.

Single cell suspensions were then pelleted in 96-well U-bottom trays (400 rcf, 2 min) at  $2 \times 10^6$  cells/well. Cells were resuspended in Zombie Live Dead stain (1:1000 dilution in PBS, BioLegend) for 15 min at RT in the dark. All subsequent incubations were performed at 4°C. Cells were washed twice in FACS buffer (PBS + 1% BSA + 0.04% Sodium Azide), and blocked with murine γ-globulin (200 µg/ml in FACS buffer) for 10 min. Cells were stained with primary antibodies CD11b-PE 1/200, CD11v-BV785 1/100, CD24-BV711 1/500, CD45-FITC 1/1000, CD64-BV421 1/100, Ly6C-PerCP-Cy5.5 1/200, Ly6g-BUV396 1/200 and iA/ie-BV650 1/200 for 15 min. Cells were then washed in Permashield (BD), followed by a PBS + 0.04% sodium azide wash prior to resuspension in 1% PFA.

For analysis of neutrophils on anti-ly6G treated murine blood samples: 200 µl of blood was taken from mice after anti-ly6G or isotype control treatment. All blood samples were incubated in red cell lysis buffer (155 mM NH<sub>4</sub>Cl and 170 mM Tris-HCl (pH 7.65) combined at a 9:1 ratio, with pH adjusted to 7.2) for 45 min at 37°C. Samples were thoroughly washed in PBS and kept on ice until staining.

Single cell suspensions were then pelleted in 96-well U-bottom trays (400 rcf, 2 min) at  $2 \times 10^6$  cells/well. Cells were resuspended in Zombie Live Dead stain (1:1000 dilution in PBS, BioLegend) for 15 min at RT in the dark. All subsequent

incubations were performed at 4°C. Cells were washed twice in FACS buffer (PBS + 1% BSA + 0.04% Sodium Azide), and blocked with murine  $\gamma$ -globulin (200  $\mu$ g/ml in FACS buffer) for 10 min. Cells were then stained with CD11b-PE (1/200), Ly6C-PerCP-Cy5.5 (1/200), CD45-FITC (1/1000), GR-1 Biotin (1/300) and Strep BV421 (1/200) for 15 min. Cells were then washed in Permashield (BD), followed by a PBS + 0.04% sodium azide wash prior to resuspension in 1% PFA.

## Instrument

Data acquisition for all murine lung tissues samples were performed on a BD LSRFortessa X-20 flow cytometer.

## Software

All flow cytometry data was analysed using FlowJo software, v10.4.1

## Cell population abundance

6 h post pneumococcal infection, cell populations for each of the tested major immune cell populations varied according to the specific pneumococcal strain, as specified in Figure 5.

24 h after anti-Ly6G intraperitoneal administration, an average of 76.35% reduction in neutrophil populations was observed in murine blood relative to isotype controls (Supplementary Fig. 3A)

Following IL-17A depletion in mice as detailed in the materials and methods (Supplementary Fig. 3B), an intranasal challenge was performed using the pneumococcal strain 9-47. 6 h post-infection, a 22.23% reduction in neutrophil populations was observed in murine lungs relative to isotype controls (Supplementary Fig. 3C).

## Gating strategy

For detection of T cells, B cells, natural killer cells, neutrophils, eosinophils, inflammatory monocytes, resident monocytes, alveolar macrophages, interstitial macrophages, CD11b- dendritic cells (CD11b- DC), and CD11b+ dendritic cells (CD11b+ DC) in murine lungs 6 h post pneumococcal infection, isolated cells were identified by first gating on size and singularity, followed by exclusion of dead cells using the Zombie NIR™ stain (BioLegend). The specific gating strategy for each immune cell populations can be found in Supplementary Fig. 1.

For detection of neutrophils on anti-ly6G treated murine blood samples, isolated cells were first gated for size and singularity, followed by gating for leukocytes using CD45. CD11b+ cells were then gated (Supplementary Fig. 2), and subsequently neutrophils were detected as GR1int/hi and Ly6Cint.

Tick this box to confirm that a figure exemplifying the gating strategy is provided in the Supplementary Information.
